# Supplementary material
Source: HighWire-hosted journal article supplement (https://bibliotheek.ehb.be/content/38/8/636)
Supplement: inline-supplementary-material-1 [file inline-supplementary-material-1.pdf]

**BEC PRE- and POST-COURSE SURVEY FOR PARTICIPANTS****Demographics:**

What is your job title? \_\_\_\_\_

Where do you work? *(please circle)*

dispensary health centre district regional tertiary other: \_\_\_\_\_

How long since you finished your training?

How long have you worked at your current job?

1. How would you rate your **confidence** in the following:

|                                                                    | Not<br>confident<br>at all | Not<br>Sure | Fair | Very<br>confident |
|--------------------------------------------------------------------|----------------------------|-------------|------|-------------------|
| Emergency management of the acutely ill adult                      |                            |             |      |                   |
| Emergency management of the acutely ill child                      |                            |             |      |                   |
| Emergency management of the injured adult                          |                            |             |      |                   |
| Emergency management of the injured child                          |                            |             |      |                   |
| Emergency management of the patient with Shock                     |                            |             |      |                   |
| Emergency management of the patient with altered mental state      |                            |             |      |                   |
| Emergency management of the patient with difficulty in breathing   |                            |             |      |                   |
| Understanding of emergency drugs                                   |                            |             |      |                   |
| Have skills to manage an obstructed (blocked) airway               |                            |             |      |                   |
| Have skills to manage manage a patient with difficult in breathing |                            |             |      |                   |
| Have skills to manage a patient with bleeding problems             |                            |             |      |                   |
| Have the skills to immobilise patients                             |                            |             |      |                   |
