# Supplementary material
Source: HighWire-hosted journal article supplement (https://bibliotheek.ehb.be/content/38/8/636)
Supplement: inline-supplementary-material-2 [file inline-supplementary-material-2.pdf]

| Study site |          | n   | # of Q's correct, of 25 (median) |               |      |      | Wilcoxon sign-ranked test results |         |
|------------|----------|-----|----------------------------------|---------------|------|------|-----------------------------------|---------|
| Country    | Hospital |     | Pre-training                     | Post-training | Diff | IQR  | V                                 | p-value |
|            | Kawolo   | 142 | 3                                | 4             | 1    | 1.00 | 5015                              | <0.001  |
|            | Mubende  | 130 | 3                                | 4             | 1    | 1.00 | 2627                              | <0.001  |
| Uganda     |          | 272 | 3                                | 4             | 1    | 1.00 | 14835                             | <0.001  |

Appendix 2: Testing the change in median confidence rating for twelve EC skills using the Wilcoxon sign-ranked test matched on participant. This shows the median confidence rating was higher after participation in the training when assessed for both Ugandan sites and when stratified by site
